# Supplementary material for: Praseodymia–titania mixed oxide supported gold as efficient water gas shift catalyst: modulated by the mixing ratio of oxides
Source: Royal Society of Chemistry journal article supplement (doi:10.1039/d1ra08572g), 2022-01-01
Supplement: d1ra08572g1.pdf [file d1ra08572g1.pdf]

## Supporting Information

### Praseodymia-Titania Mixed Oxides Supported Gold as Efficiency Water Gas Shift Catalyst: Modulated by the Mixing Ratio of Oxides

Weixuan Zhao,<sup>a#</sup> Junjie Shi,<sup>ab#\*</sup> Mingyue Lin,<sup>c</sup> Libo Sun,<sup>a</sup> Huijuan Su,<sup>a</sup> Xun Sun,<sup>a</sup> Toru Murayama,<sup>a,d,e</sup> Caixia Qi<sup>a\*</sup>

<sup>a</sup> Shandong Applied Research Centre of Gold Nanotechnology, School of Chemistry & Chemical Engineering, Yantai University, Yantai 264005, China.

<sup>b</sup> Department of Chemical Engineering, University of Florida, Gainesville, Florida 32611, United States.

<sup>c</sup> State Environmental Protection Key Laboratory of Environmental Risk Assessment and Control on Chemical Process, School of Resources and Environmental Engineering, East China University of Science and Technology, Shanghai 200237, China

<sup>d</sup> Research Center for Gold Chemistry, Department of Applied Chemistry for Environment, Graduate School of Urban Environmental Sciences, Tokyo Metropolitan University, Tokyo 192-0397, Japan.

<sup>e</sup> Research Center for Hydrogen Energy-based Society, Department of Applied Chemistry for Environment, Graduate School of Urban Environmental Sciences, Tokyo Metropolitan University, Tokyo 192-0397, Japan

<sup>#</sup>These authors contributed equally to this work.

\* Corresponding authors: qicx@ytu.edu.cn and junjieshiding@gmail.com

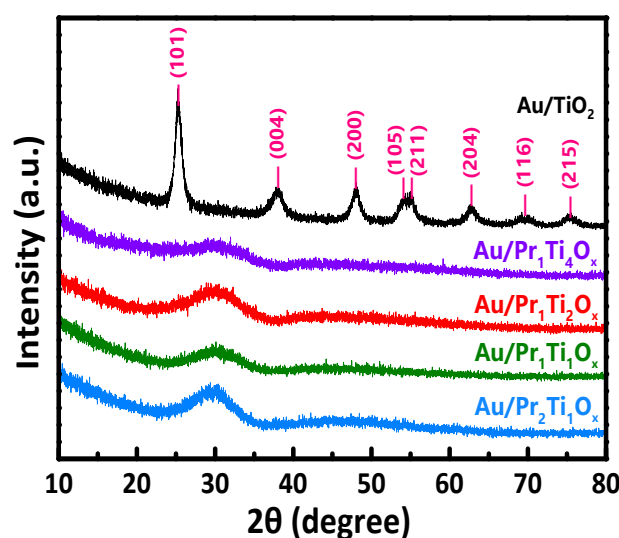

Figure S1. XRD patterns of Au/TiO<sub>2</sub> and Au/Pr<sub>a</sub>Ti<sub>b</sub>O<sub>x</sub> catalysts.

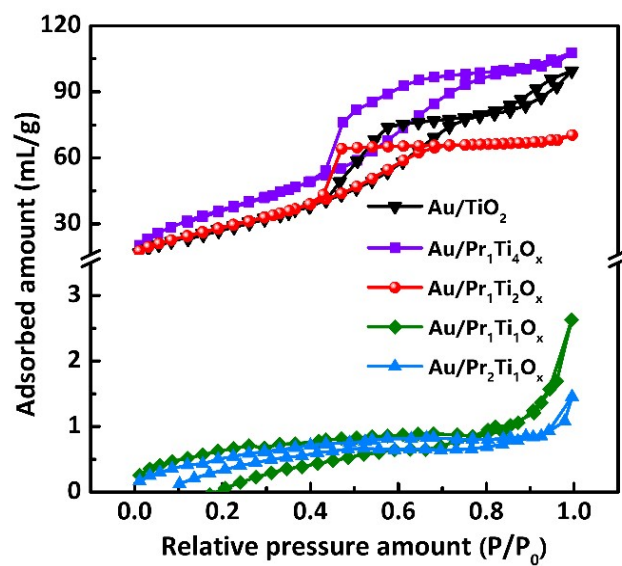

Figure S2. Nitrogen physisorption adsorption/desorption isotherms.

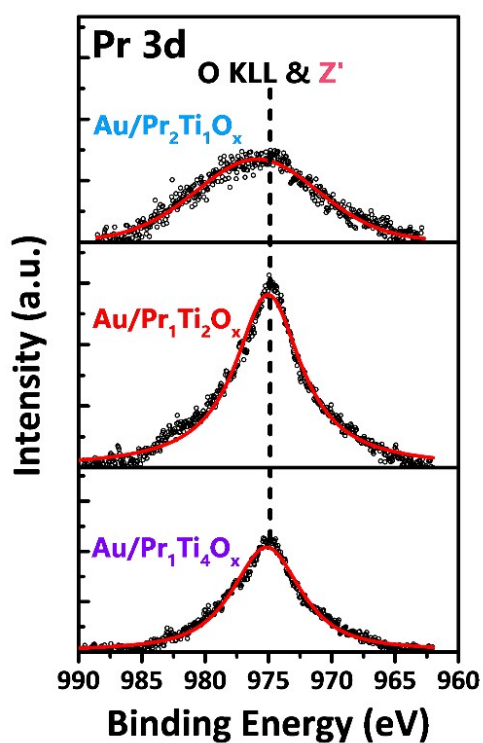

Figure S3. XPS characterization of Pr 3d in Au/Pr<sub>a</sub>Ti<sub>b</sub>O<sub>x</sub> catalysts after use in WGS (2 vol% CO + 10 vol% H<sub>2</sub>O/N<sub>2</sub>, 10 h on-stream, 150 to 400 °C).

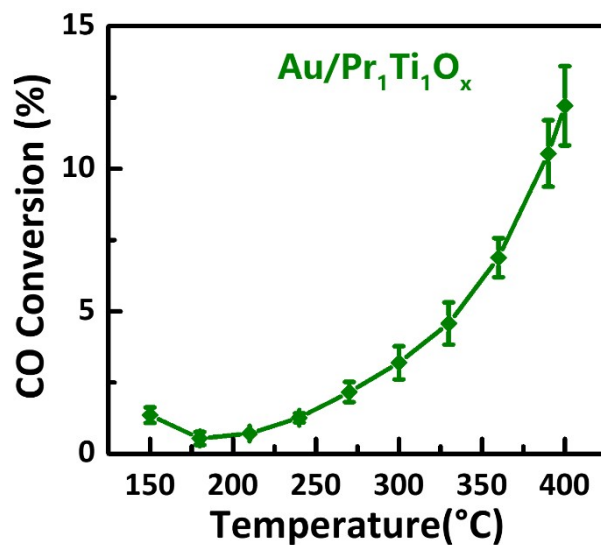

Figure S4. Steady-state test profiles of Au/Pr<sub>1</sub>Ti<sub>1</sub>O<sub>x</sub> catalysts for the WGS reaction (conditions: 2 vol% CO/10 vol% H<sub>2</sub>O/N<sub>2</sub>, 45 mL min<sup>-1</sup>, m<sub>catal</sub> = 50 mg, space velocity 54000 mL h<sup>-1</sup>g<sub>cat</sub><sup>-1</sup>).

| Sample                                            | ICP<br>Au loading | S <sub>BET</sub> (m <sup>2</sup> ·g <sup>-1</sup> ) |
|---------------------------------------------------|-------------------|-----------------------------------------------------|
| Au/Pr <sub>1</sub> Ti <sub>1</sub> O <sub>x</sub> | 0.52              | 2.3                                                 |

Table S1. Physicochemical properties of Au/Pr<sub>1</sub>Ti<sub>1</sub>O<sub>x</sub> Catalyst.

| Sample                                            | Au species (%)   |                 |                 |
|---------------------------------------------------|------------------|-----------------|-----------------|
|                                                   | Au <sup>3+</sup> | Au <sup>+</sup> | Au <sup>0</sup> |
| Au/TiO <sub>2</sub>                               | 12.8             | 13.8            | 73.4            |
| Au/Pr <sub>1</sub> Ti <sub>4</sub> O <sub>x</sub> | 11.3             | 18.7            | 70.0            |
| Au/Pr <sub>1</sub> Ti <sub>2</sub> O <sub>x</sub> | 15.7             | 20.1            | 64.2            |
| Au/Pr <sub>2</sub> Ti <sub>1</sub> O <sub>x</sub> | 13.4             | 41.7            | 44.9            |

Table S2. Compositions of the Au 4f photoelectron Lines of the Au/TiO<sub>2</sub> and Au/Pr<sub>a</sub>Ti<sub>b</sub>O<sub>x</sub> catalysts.
